# Supplementary material for: Patterns of RNA Editing in Newcastle Disease Virus Infections
Source: PubMed Central journal article supplement (PMC7693698; doi:10.3390/v12111249), 2020-11-02
Supplement: viruses-12-01249-s001.pdf [file viruses-12-01249-s001.pdf]

Supplementary Figures and Tables

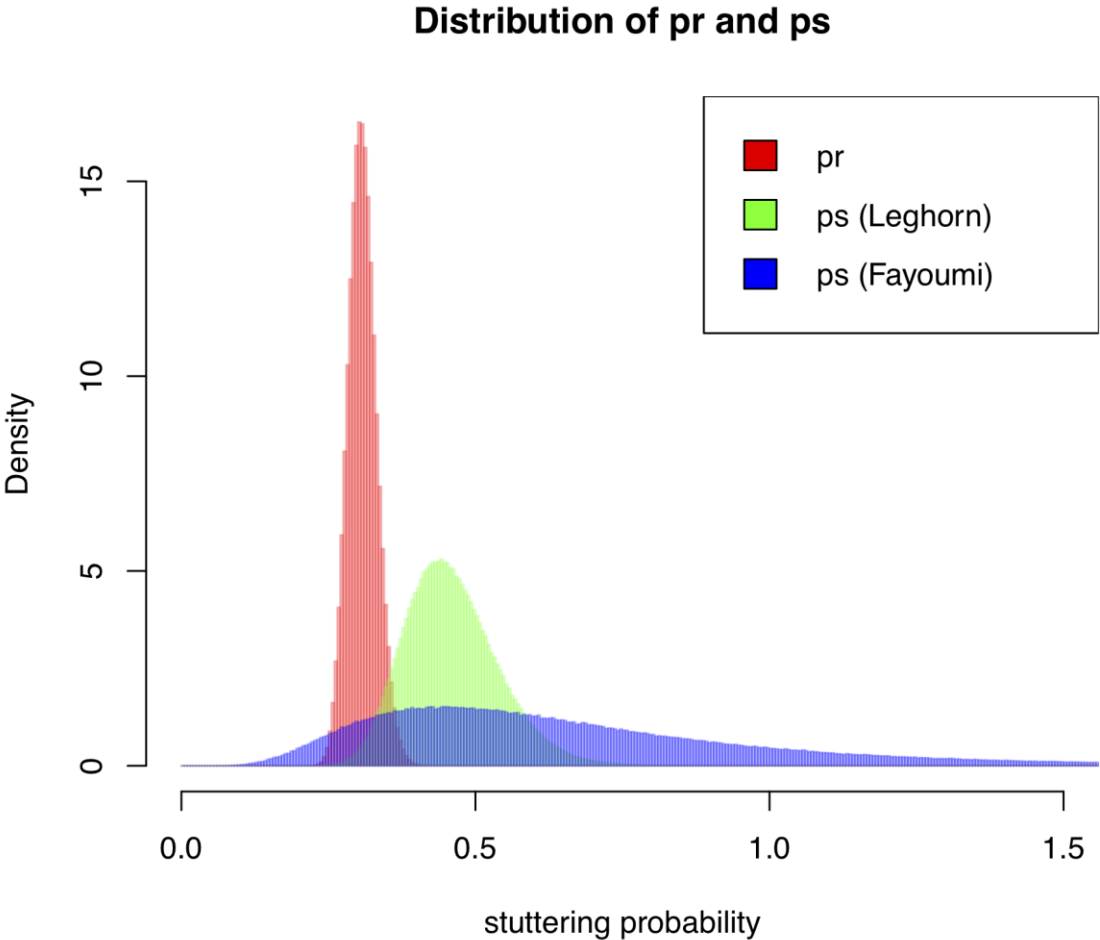

Supplementary Figure 1: distributions of inferred values of  $p_r, p_s$  from the weighted linear model presented in the Main Text, assuming independent Gaussian uncertainties for each term of the regression.

**Supplementary Table 1:** information about samples.

| Study type | Samples        | Sample ENA-Run | Chicken Line | Sex    | Age in days                    | Organ          | Cell Type       | Virus    | Viral Dose                                                    | Time points | Reference |
|------------|----------------|----------------|--------------|--------|--------------------------------|----------------|-----------------|----------|---------------------------------------------------------------|-------------|-----------|
| In vivo    | Sample 28      | ERR1817162     | Leghorn      | Female | 23                             | Trachea        | Epithelial cell | LaSota   | 200 microliters 10 <sup>7</sup> embryo infectious dose of 50% | 2 dpi       | [23]      |
| In vivo    | Sample 32      | ERR1817163     | Leghorn      | Female | 23                             | Trachea        | Epithelial cell | LaSota   | 201 microliters 10 <sup>7</sup> embryo infectious dose of 50% | 2 dpi       | [23]      |
| In vivo    | Sample 30      | ERR1817164     | Leghorn      | Male   | 23                             | Trachea        | Epithelial cell | LaSota   | 202 microliters 10 <sup>7</sup> embryo infectious dose of 50% | 2 dpi       | [23]      |
| In vivo    | Sample 42      | ERR1817166     | Fayoumi      | Female | 23                             | Trachea        | Epithelial cell | LaSota   | 204 microliters 10 <sup>7</sup> embryo infectious dose of 50% | 2 dpi       | [23]      |
| In vivo    | Sample 43      | ERR1817167     | Fayoumi      | Female | 23                             | Trachea        | Epithelial cell | LaSota   | 205 microliters 10 <sup>7</sup> embryo infectious dose of 50% | 2 dpi       | [23]      |
| in vitro   | LaSota rep 1   | NA             | NA           | NA     | 10-day-old SPF chicken embryos | Chicken embryo | Fibroblast cell | LaSota   | MOI=1                                                         | 12 hpi      | [20]      |
| in vitro   | LaSota rep 2   | NA             | NA           | NA     | 10-day-old SPF chicken embryos | Chicken embryo | Fibroblast cell | LaSota   | MOI=1                                                         | 12 hpi      | [20]      |
| in vitro   | LaSota rep 3   | NA             | NA           | NA     | 10-day-old SPF chicken embryos | Chicken embryo | Fibroblast cell | LaSota   | MOI=1                                                         | 12 hpi      | [20]      |
| in vitro   | Herts/33 rep 1 | NA             | NA           | NA     | 10-day-old SPF chicken embryos | Chicken embryo | Fibroblast cell | Herts/33 | MOI=1                                                         | 12 hpi      | [20]      |
| in vitro   | Herts/33 rep 2 | NA             | NA           | NA     | 10-day-old SPF chicken embryos | Chicken embryo | Fibroblast cell | Herts/33 | MOI=1                                                         | 12 hpi      | [20]      |
| in vitro   | Herts/33 rep 3 | NA             | NA           | NA     | 10-day-old SPF chicken embryos | Chicken embryo | Fibroblast cell | Herts/33 | MOI=1                                                         | 12 hpi      | [20]      |

**Supplementary Table 2: L/P coverage ratio as upper bound on the contribution of genomic RNA to the reads, for each sample in our datasets.**

| Samples                          |          |           | P coverage  | L coverage   | L:P   |
|----------------------------------|----------|-----------|-------------|--------------|-------|
| Host                             | Virus    | Replicate | (1887:3074) | (8381:14995) | Ratio |
| in vivo Leghorn<br>(susceptible) | LaSota   | 1         | 881.202     | 35.31293     | 0.04  |
|                                  |          | 2         | 6016.106    | 102.4608     | 0.017 |
|                                  |          | 3         | 2856.423    | 38.40847     | 0.013 |
| in vivo Fayomi<br>(susceptible)  | LaSota   | 1         | 694.4924    | 20.2972      | 0.029 |
|                                  |          | 2         | 238.7239    | 3.715949     | 0.016 |
|                                  |          | 3         | 174.6684    | 3.451534     | 0.02  |
| in vitro<br>CEF cells            | LaSota   | 1         | 21446.46    | 22403.22     | 1.045 |
|                                  |          | 2         | 21193.6     | 22510.9      | 1.062 |
|                                  |          | 3         | 22834.04    | 24100.62     | 1.055 |
|                                  | Herts/33 | 1         | 132665.8    | 83765.88     | 0.631 |
|                                  |          | 2         | 144995.7    | 98281.21     | 0.678 |
|                                  |          | 3         | 128781.9    | 96594.86     | 0.75  |

**Supplementary Table 3: p-values of Student's t-test for differences in fraction of P mRNA.**

| <i>p</i> -value | Leghorn   | Fayoumi   | CEF Herts/33 | CEF LaSota |
|-----------------|-----------|-----------|--------------|------------|
| Leghorn         | 1.0000000 | 0.0889002 | 0.0001608    | 0.0000055  |
| Fayoumi         | 0.0889002 | 1.0000000 | 0.0001028    | 0.0000048  |
| CEF Herts/33    | 0.0001608 | 0.0001028 | 1.0000000    | 0.0001686  |
| CEF LaSota      | 0.0000055 | 0.0000048 | 0.0001686    | 1.0000000  |

**Supplementary Table 4: combined linear model for log<sub>10</sub>(mRNA fraction) as a function of experiments and length of insertion.**

| <b>Coefficient</b>     | <b>Estimate</b> | <b>Std. Error</b> | <b>t value</b> | <b>Pr(&gt; t )</b> |
|------------------------|-----------------|-------------------|----------------|--------------------|
| (intercept)            | 0.0078917       | 0.1438051         | 0.0548776      | 0.9563945          |
| <i>l</i> (slope)       | -0.5291164      | 0.0360768         | -14.6664042    | 0.0000000          |
| Fayoumi                | 0.0737049       | 0.2320661         | 0.3176032      | 0.7517451          |
| CEF-LaSota             | -0.3953569      | 0.1830215         | -2.1601668     | 0.0342359          |
| CEF-Herts/33           | -0.8453087      | 0.1990163         | -4.2474354     | 0.0000663          |
| <i>l</i> :Fayoumi      | -0.0383042      | 0.0729569         | -0.5250249     | 0.6012488          |
| <i>l</i> :CEF-LaSota   | 0.0135007       | 0.0411087         | 0.3284146      | 0.7435928          |
| <i>l</i> :CEF-Herts/33 | 0.0557983       | 0.0481860         | 1.1579794      | 0.2508650          |
